# Supplementary material for: Leishmania infantum Exoproducts Inhibit Human Invariant NKT Cell Expansion and Activation
Source: PubMed Central journal article supplement (PMC5474685; doi:10.3389/fimmu.2017.00710), 2017-06-19
Supplement: image_3.pdf [file image_3.pdf]

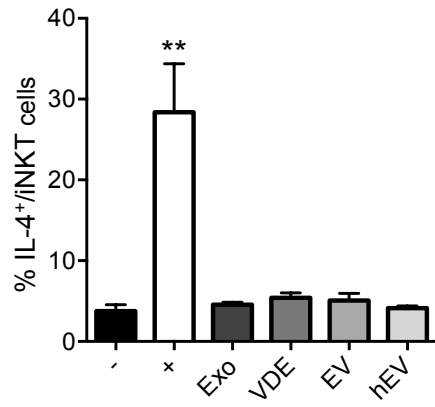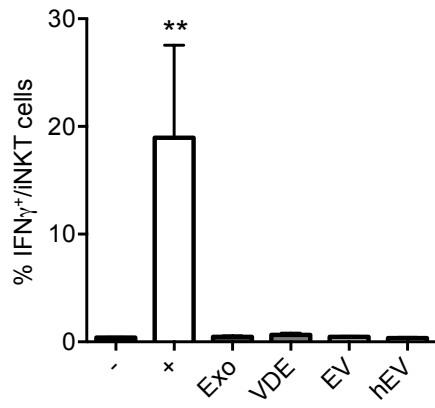

S3 Fig
